# Supplementary material for: Real-time liquid crystal-based biosensor for urea detection
Source: Royal Society of Chemistry journal article supplement (doi:10.1039/c4ay00866a), 2014-01-01
Supplement: c4ay00866a1.pdf [file c4ay00866a1.pdf]

## Supporting Information

# Real-time liquid crystal-based biosensor for urea detection

*Mashooq Khan,<sup>1</sup> Young Kyoo Kim,<sup>1</sup> Joon Hyung Lee,<sup>2</sup> Inn-Kyu Kang<sup>1</sup> and Soo-Young Park<sup>1\*</sup>*

<sup>1</sup> School of Applied Chemical Engineering, Kyungpook National University, Daegu 702-701, Republic of Korea

<sup>2</sup> School of Advanced Materials Engineering, Kyungpook National University, Daegu 702-701, Republic of Korea

\* Corresponding author E-mail: psy@knu.ac.kr

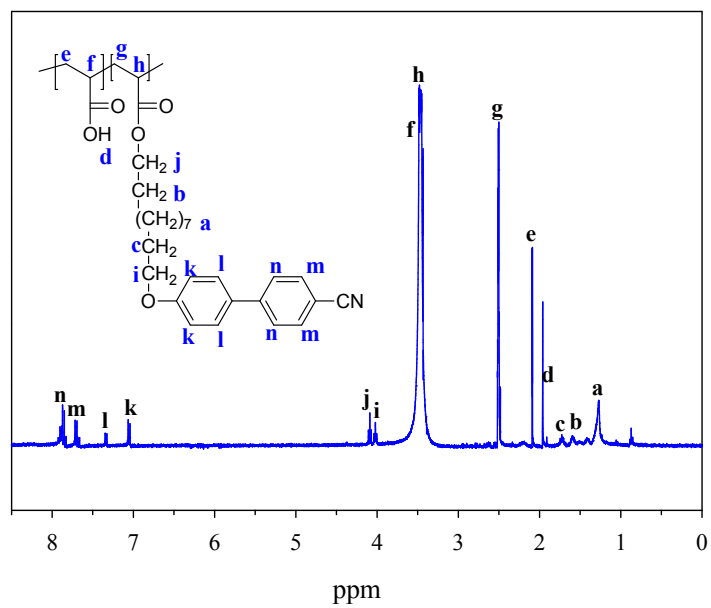

**Figure SI 1.**  $^1\text{H}$  NMR spectrum of PAA-b-LCP.

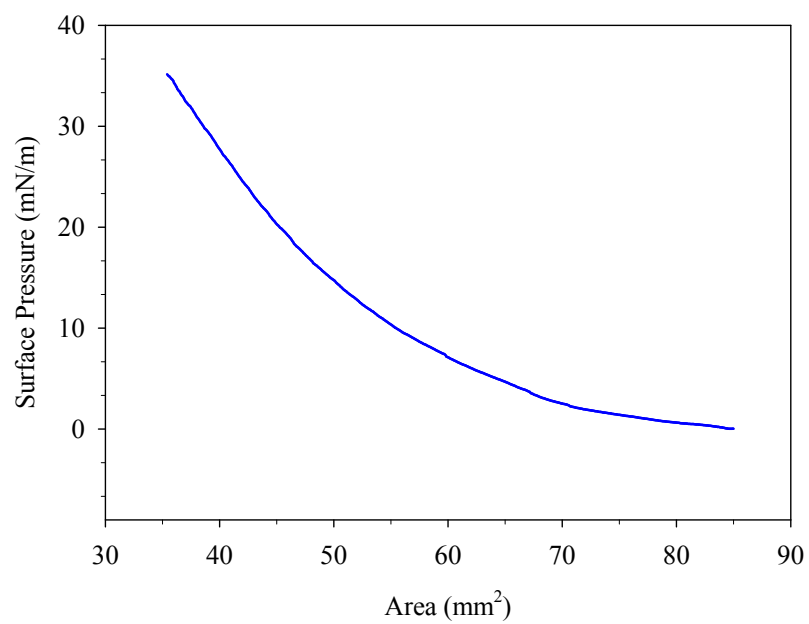

**Figure SI 2.** LB isotherm curve of the PAA-b-LCP monolayer on water.

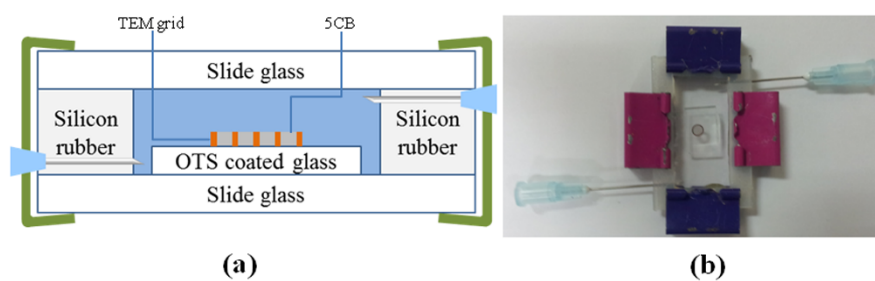

**Figure SI 3.** (a) Schematic diagram and (b) photograph of the sensor cell containing a TEM grid cell.

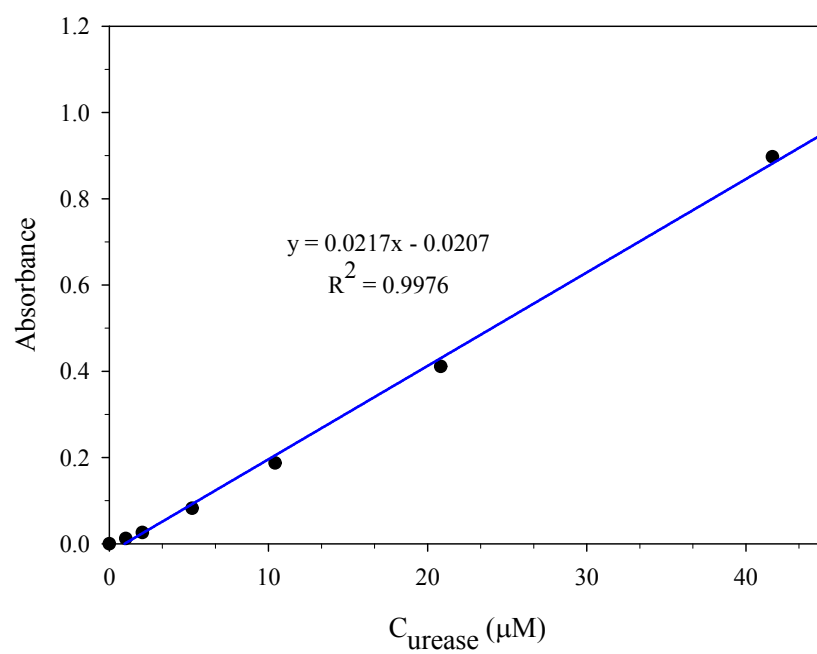

**Figure SI 4.** Calibration curve of the urease solutions at  $\lambda = 276 \text{ nm}$ .

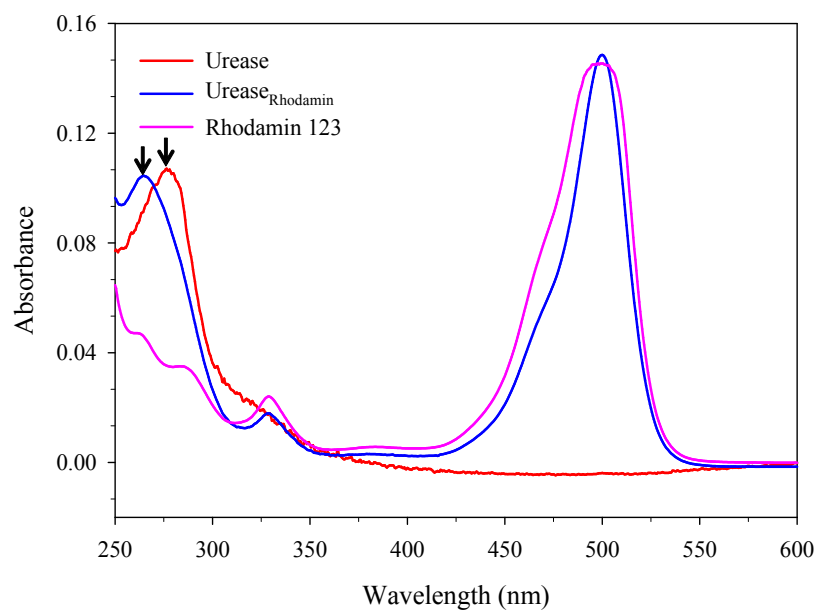

**Figure SI 5.** UV-VIS spectra of urease, Rhodamin and urease<sub>-rhodamin-</sub>.
